# Supplementary material for: On the role of polymeric hydrogels in the thermal response of gold nanorods under NIR laser irradiation
Source: Royal Society of Chemistry journal article supplement (doi:10.1039/d3na00353a), 2023-01-01
Supplement: d3na00353a1.pdf [file d3na00353a1.pdf]

## *Supporting Information*

### **On the role of polymeric hydrogels in the thermal response of gold nanorods under NIR laser irradiation**

Elisa Lacroce <sup>a,1</sup>, Leonardo Bianchi <sup>b,1</sup>, Laura Polito <sup>c</sup>, Sanzhar Korganbayev <sup>b</sup>,

Alessandro Molinelli <sup>a</sup>, Alessandro Sacchetti <sup>a</sup>, Paola Saccomandi <sup>b,2,\*</sup> and Filippo Rossi <sup>a,2,\*</sup>

<sup>a</sup> Department of Chemistry, Materials and Chemical Engineering “Giulio Natta”, Politecnico di Milano,  
via Mancinelli 7, 20131 Milan, Italy

<sup>b</sup> Department of Mechanical Engineering, Politecnico di Milano, via Giuseppe La Masa 1, 20156 Milan,  
Italy

<sup>c</sup> Consiglio Nazionale delle Ricerche, CNR-SCITEC, Via Giuseppe Fantoli 16/15, 20138 Milan, Italy

<sup>1</sup> equally contributed

<sup>2</sup> share the last authorship

\* Paola Saccomandi, email: [paola.sacomandi@polimi.it](mailto:paola.sacomandi@polimi.it), Tel: +39-02-2399-8470

\* Filippo Rossi, email: [filippo.rossi@polimi.it](mailto:filippo.rossi@polimi.it), Tel: +39-02-2399-3145

## Hydrogel characterization

### *Thermogravimetric analysis (TGA)*

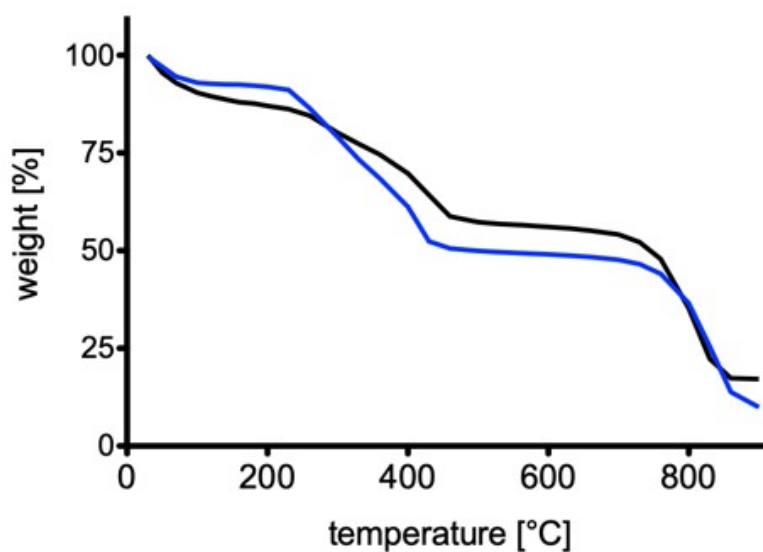

**Figure S1.** TGA analyses of Au NRs-loaded hydrogel samples (blue line) and control samples (black line).

### *Differential scanning calorimetry (DSC)*

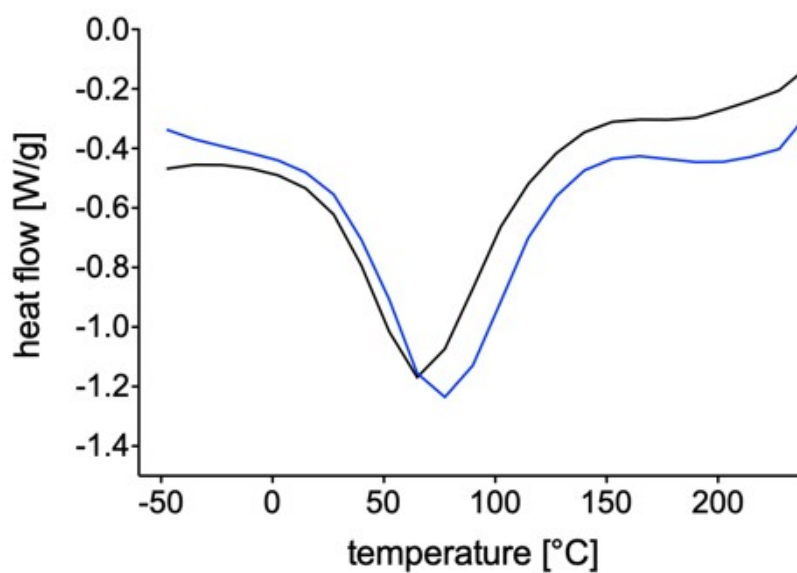

**Figure S2.** DSC analyses of Au NRs-loaded hydrogel samples (blue line) and control samples (black line).

*Gelation time*

|                     | HGs   | Au-HGs |
|---------------------|-------|--------|
| gelation time [min] | 7'10" | 7'20"  |

**Table S1.** Gelation time of Au NRs-loaded hydrogel samples (Au-HGs) and control samples (HG).

*Scanning electron microscopy (SEM)*

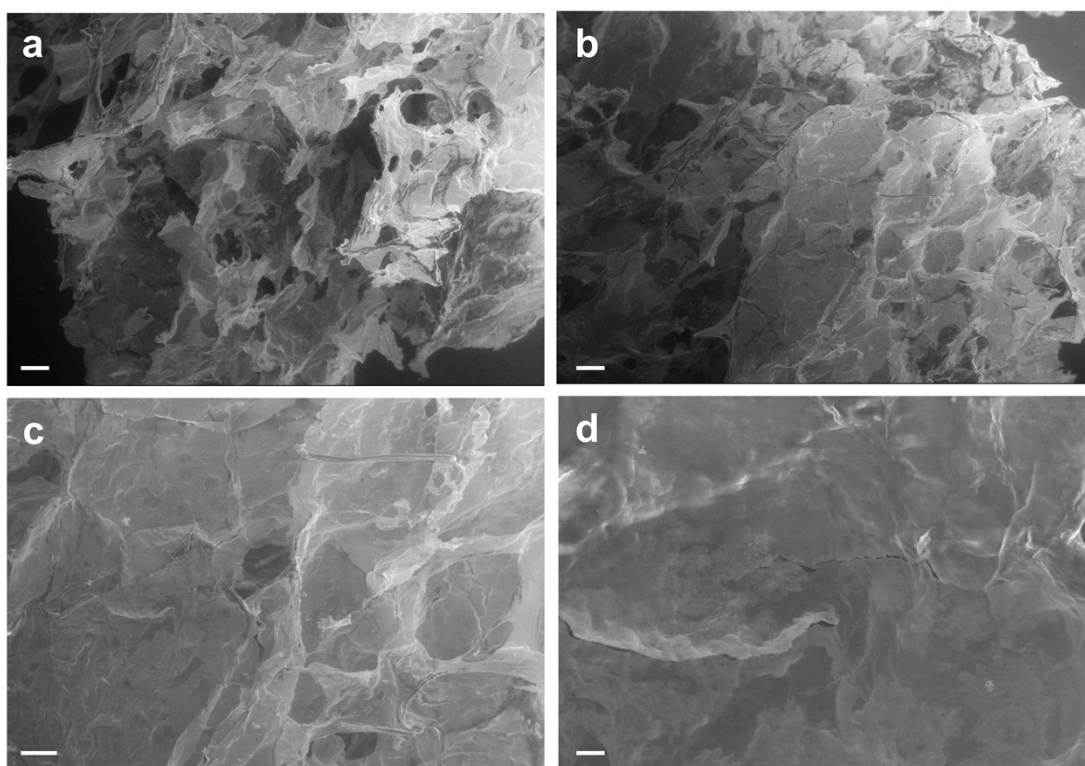

**Figure S3.** SEM analysis of AC hydrogels loaded with Au NRs (a, c) and neat AC hydrogels (b, d). Scale bars: 200 μm (a, b); 100 μm (c); 20 μm (d).
